# Supplementary material for: Exosome long non-coding RNA SOX2-OT contributes to ovarian cancer malignant progression by miR-181b-5p/SCD1 signaling
Source: Aging (Albany NY). 2021 Oct 24;13(20):23726–38. doi: 10.18632/aging.203645 (PMC8580347; doi:10.18632/aging.203645)
Supplement: Supplementary Figure 1 [file aging-13-203645-s001.pdf]

SUPPLEMENTARY FIGURE

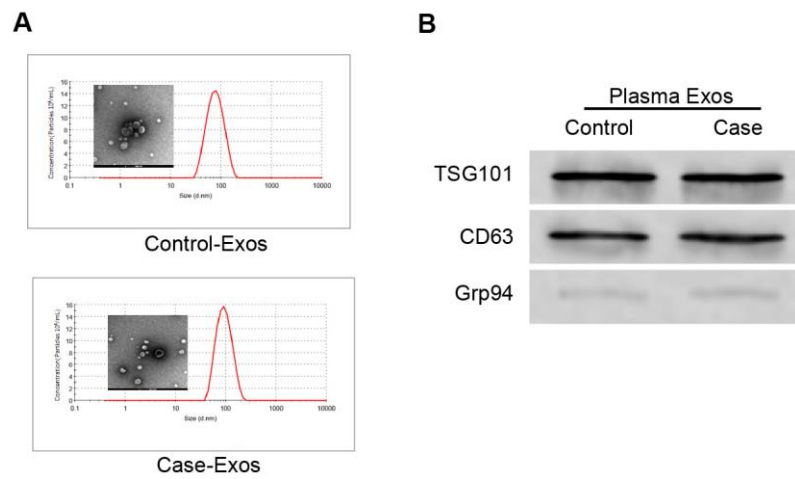

**Supplementary Figure 1. The identification of plasma exosome from ovarian cancer patients.** (A) The characteristics of exosomes were assessed by the TEM in the ovarian cancer patients. (B) The expression of TSG101, CD63, and Grp94 was measured by Western blot analysis in the exosome from ovarian cancer patients.
